### Catheter ablation in atrial fibrillation: comorbidities and mortality from high-volume centers

J. Sousa<sup>1</sup>, J. Carmo<sup>2</sup>, D. Matos<sup>2</sup>, G. Rodrigues<sup>2</sup>, A. Ferreira<sup>2</sup>, J. Alencar<sup>2</sup>, F. Klemtz<sup>2</sup>, A. Durazzo<sup>2</sup>, S. Carvalho<sup>2</sup>, F.M. Costa<sup>2</sup>, P. Carmo<sup>2</sup>, L. Parreira<sup>3</sup>, F. Morgado<sup>2</sup>, D. Cavaco<sup>2</sup>, P. Adragao<sup>2</sup>

<sup>1</sup>Hospital Dr. Nelio Mendonca, Funchal, Portugal; <sup>2</sup>Hospital de Santa Cruz, Cardiology, Lisbon, Portugal; <sup>3</sup>Hospital da Luz, SA, Cardiology, Lisbon, Portugal

**Funding Acknowledgement:** Type of funding source: None

**Background:** Catheter ablation (CA), has gained wider acceptance as an attractive option for treating symptomatic AF. Although traditionally seen as a safe procedure, there is limited and conflicting data on procedure-related early morbimortality, with new evidence suggesting early mortality may be as high as 0.5%-1%.

**Purpose:** We aimed to assess the rates of early and late morbimortality of post-atrial fibrillation (AF) ablation in high-volume centers.

**Methods:** Prospective registry of 2 high-volume ablation centers, comprising 3722 consecutive patients (mean age 61.1±11.2, 66.4% male, n=2471), who underwent AF ablation from 2005 to 2019. Early mortality was defined as death during initial admission or during the first 45 days after ablation. Median follow-up time was 5.4 years.

**Results:** Most patients were treated with radiofrequency (97%) while 3% were treated with cryoablation. Early mortality was 0.08% (n=3), with a median time from ablation to death of 22 days. Cumulative mortality at 3,

6 and 12 months was 0.08%, 0.16% and 0.19%, respectively. At 3 and 5 years, mortality remained low at 0.48% and 0.73%, respectively. Early mortality was higher among patients who had suffered procedural complications (fistula and stroke, p<0.001). Among the latter, pericardial effusion and tamponade were the most frequently found (0.6%, n=24), only 1 of which required emergent surgical drainage and myocardial repair. Early ischemic stroke occurred in 2 patients (0.1%). Other less frequent complications were atrio-esophageal fistula (0.1%, n=2), phrenic nerve palsy (0.1%, n=2), anoxic encephalopathy following cardiac arrest (0.03%, n=1) and pulmonary vein stenosis (0.03%, n=1).

**Conclusion:** Early mortality following ablation is very low (<0.1%), when performed by an experienced high-volume team. Severe complications are rare (<1%) and mostly amenable to treatment. Our findings reaffirm the overall safety of AF ablation.

| Baseline characteristics of our population |               |                                    |          |
|--------------------------------------------|---------------|------------------------------------|----------|
| Hospital A                                 | 52.8% (1964)  | Diabetes                           | 9.5%     |
| Hospital B                                 | 47.2% (1759)  | Obesity (BMI>30Kg/m <sup>2</sup> ) | 23.8%    |
| Radiofrequency                             | 97%           | mean CHADSVASC                     | 1.49±1.1 |
| Cryoablation                               | 3%            | previous Stroke                    | 3.6%     |
| Previous ablation/redo                     | 18.2%         | previous CAD                       | 5.2%     |
| Age, years                                 | 61±11         | OAC                                | 65.2%    |
| Gender (M/F)                               | (66.4%/33.6%) | Antiarrhythmics                    | 43.9%    |
| BMI (Kg/m <sup>2</sup> )                   | 27.6±4.3      | Hypertension                       | 50%      |
| Smoking habits                             | 17.3%         |                                    |          |

Early mortality and cumulative mortality

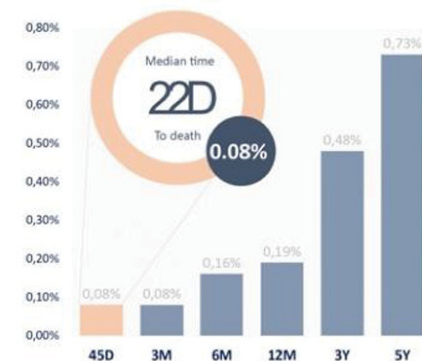

AF catheter ablation morbimort
